# Supplementary material for: Resistome in the indoor dust samples from workplaces and households: a pilot study
Source: PubMed Central journal article supplement (PMC11649746; doi:10.3389/fcimb.2024.1484100), 2024-12-03
Supplement: Image3.pdf [file Image3.pdf]

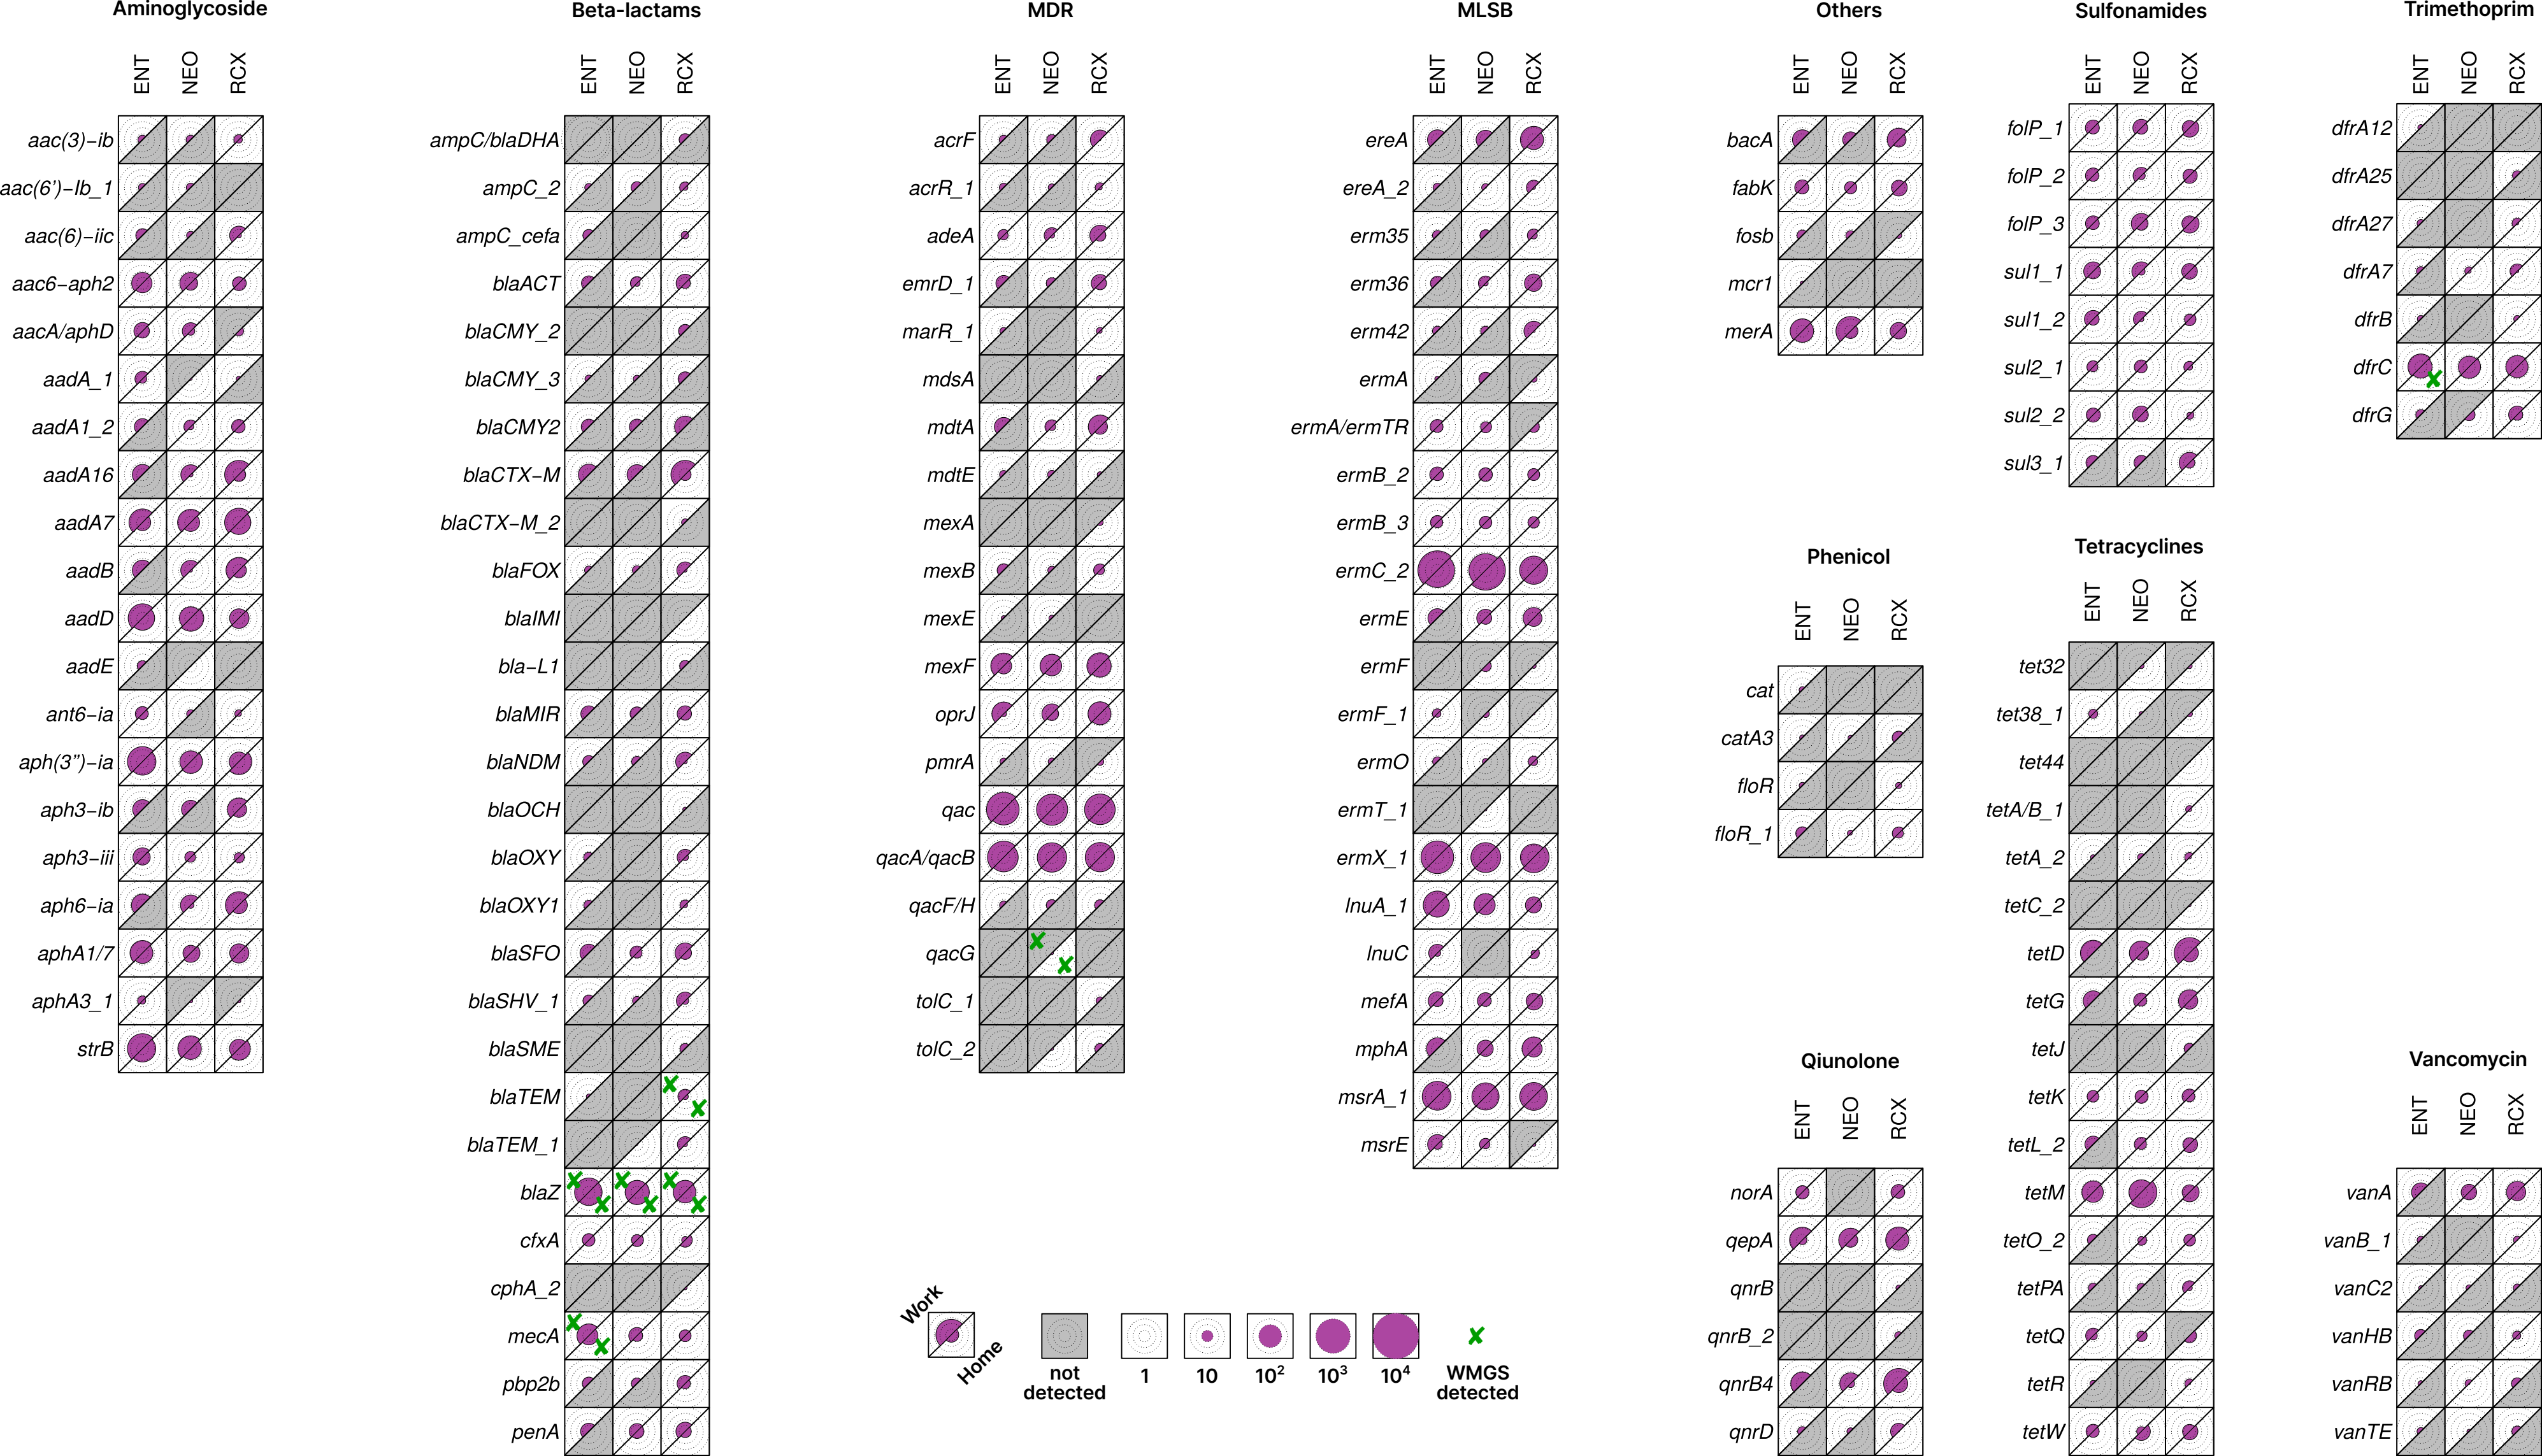

**Supplementary Figure S3.** Heatmap of antibiotic resistance genes (ARGs) in all pooled samples found by HT-qPCR (relative quantity) and/or WMGS (presence). Data scaled by the minimal non-zero value. The upper part of each cell corresponds to household samples (Home) and the lower diagonal part corresponds to workplace samples (Work), facilitating easy paired comparison. Circles inside cells indicate orders of magnitude for readability. Cross marks (X) denote ARGs found in WMGS.

ENT, pediatric hospital; NEO, maternity hospital; and RCX, research center; MDR, multidrug resistance; MLSB, genes associated with macrolides, lincosamides, and streptogramin B phenotype; HT-qPCR, high-throughput quantitative PCR; WMGS, whole metagenome shotgun sequencing
